# Supplementary material
Source: HighWire-hosted journal article supplement (https://bmjopen.bmj.com/content/10/11/e036855)

## Supplementary Material: A spatio-temporal model to estimate life expectancy and to detect unusual trends at the local authority level in England

Areti Boulieri<sup>a</sup>, Marta Blangiardo<sup>a\*</sup>

<sup>a</sup> Department of Epidemiology and Biostatistics, MRC Centre for Environment and Health, Imperial College London, London, UK

\* Corresponding author:

Marta Blangiardo

Imperial College London, St Mary's Campus,

Norfolk Place, W2 1PG

[m.blangiardo@imperial.ac.uk](mailto:m.blangiardo@imperial.ac.uk)

Table S1: : Local authorities with a low life expectancy for their deprivation level for females under the model with deprivation index at 2010. The areas detected under the model with deprivation index at 2019 are a subset (in bold). We present the posterior probability under the two models.

| Local Authority                            | Year        | IMD2010   |                          | IMD2019   |                          |
|--------------------------------------------|-------------|-----------|--------------------------|-----------|--------------------------|
|                                            |             | Decile    | Pr( $\omega_{it}>0.95$ ) | Decile    | Pr( $\omega_{it}>0.95$ ) |
| Blackpool                                  | 2017        | D1        | 0.976                    | D1        | 0.912                    |
| Blackpool                                  | 2018        | D1        | 0.959                    | D1        | 0.871                    |
| Bradford                                   | 2013        | D1        | 0.981                    | D1        | 0.941                    |
| Kingston upon Hull, City of                | 2014        | D1        | 0.951                    | D1        | 0.881                    |
| Kingston upon Hull, City of                | 2015        | D1        | 0.972                    | D1        | 0.914                    |
| <b>Kingston upon Hull, City of</b>         | <b>2017</b> | <b>D1</b> | <b>0.997</b>             | <b>D1</b> | <b>0.977</b>             |
| Kingston upon Hull, City of                | 2018        | D1        | 0.981                    | D1        | 0.915                    |
| Manchester                                 | 2014        | D1        | 0.960                    | D1        | 0.894                    |
| Oldham                                     | 2014        | D1        | 0.980                    | D1        | 0.949                    |
| Stoke-on-Trent                             | 2017        | D1        | 0.980                    | D1        | 0.913                    |
| <b>Stoke-on-Trent</b>                      | <b>2018</b> | <b>D1</b> | <b>1.000</b>             | <b>D1</b> | <b>0.999</b>             |
| <b>Tameside</b>                            | <b>2018</b> | <b>D1</b> | <b>0.993</b>             | <b>D1</b> | <b>0.969</b>             |
| Wolverhampton                              | 2017        | D1        | 0.961                    | D1        | 0.864                    |
| Wolverhampton                              | 2018        | D1        | 0.991                    | D1        | 0.941                    |
| <b>Leeds</b>                               | <b>2013</b> | <b>D3</b> | <b>0.999</b>             | <b>D2</b> | <b>0.997</b>             |
| <b>Leeds</b>                               | <b>2015</b> | <b>D3</b> | <b>0.981</b>             | <b>D2</b> | <b>0.958</b>             |
| <b>Leeds</b>                               | <b>2018</b> | <b>D3</b> | <b>1.000</b>             | <b>D2</b> | <b>1.000</b>             |
| <b>Newcastle upon Tyne</b>                 | <b>2015</b> | <b>D2</b> | <b>0.974</b>             | <b>D2</b> | <b>0.951</b>             |
| Mansfield                                  | 2017        | D2        | 0.962                    | D2        | 0.919                    |
| <b>Plymouth</b>                            | <b>2017</b> | <b>D3</b> | <b>0.986</b>             | <b>D2</b> | <b>0.970</b>             |
| King's Lynn and West Norfolk               | 2017        | D3        | 0.951                    | D3        | 0.922                    |
| Medway                                     | 2014        | D3        | 0.952                    | D3        | 0.930                    |
| <b>Derby</b>                               | <b>2018</b> | <b>D4</b> | <b>0.954</b>             | <b>D3</b> | <b>0.956</b>             |
| <b>County Durham</b>                       | <b>2013</b> | <b>D3</b> | <b>0.989</b>             | <b>D4</b> | <b>0.978</b>             |
| Cornwall inc Isles of Scilly               | 2013        | D3        | 0.956                    | D4        | 0.923                    |
| <b>Cornwall inc Isles of Scilly</b>        | <b>2016</b> | <b>D3</b> | <b>0.974</b>             | <b>D4</b> | <b>0.964</b>             |
| North Tyneside                             | 2017        | D4        | 0.954                    | D4        | 0.925                    |
| Breckland                                  | 2015        | D5        | 0.956                    | D5        | 0.912                    |
| Stockport                                  | 2013        | D5        | 0.967                    | D5        | 0.942                    |
| <b>Bournemouth, Christchurch and Poole</b> | <b>2015</b> | <b>D3</b> | <b>0.998</b>             | <b>D6</b> | <b>0.996</b>             |
| Bournemouth, Christchurch and Poole        | 2016        | D3        | 0.959                    | D6        | 0.941                    |
| <b>Bournemouth, Christchurch and Poole</b> | <b>2017</b> | <b>D3</b> | <b>0.975</b>             | <b>D6</b> | <b>0.963</b>             |
| Colchester                                 | 2014        | D7        | 0.959                    | D6        | 0.925                    |
| Colchester                                 | 2017        | D7        | 0.970                    | D6        | 0.939                    |
| East Riding of Yorkshire                   | 2012        | D7        | 0.967                    | D7        | 0.931                    |

---

|                       |             |           |              |           |              |
|-----------------------|-------------|-----------|--------------|-----------|--------------|
| Epping Forest         | 2014        | D7        | 0.955        | D7        | 0.905        |
| Dorset Council        | 2016        | D7        | 0.982        | D7        | 0.946        |
| North Somerset        | 2015        | D7        | 0.967        | D7        | 0.920        |
| Chelmsford            | 2017        | D6        | 0.965        | D8        | 0.908        |
| <b>Sutton</b>         | <b>2014</b> | <b>D6</b> | <b>0.974</b> | <b>D8</b> | <b>0.954</b> |
| Tonbridge and Malling | 2018        | D8        | 0.954        | D8        | 0.889        |
| <b>Stroud</b>         | <b>2013</b> | <b>D8</b> | <b>0.977</b> | <b>D9</b> | <b>0.954</b> |
| Stroud                | 2017        | D8        | 0.952        | D9        | 0.932        |
| Harrogate             | 2014        | D9        | 0.951        | D9        | 0.901        |

---

Table S2: Local authorities with a low life expectancy for their deprivation level for males under the model with deprivation index at 2010. The areas detected under the model with deprivation index at 2019 are a subset (in bold). We present the posterior probability under the two models.

| Local Authority                     | Year        | IMD2010   |                         | IMD2019   |                         |
|-------------------------------------|-------------|-----------|-------------------------|-----------|-------------------------|
|                                     |             | Decile    | $\Pr(\omega_{it}>0.95)$ | Decile    | $\Pr(\omega_{it}>0.95)$ |
| Middlesbrough                       | 2014        | D1        | 0.962                   | D1        | 0.944                   |
| <b>Middlesbrough</b>                | <b>2017</b> | <b>D1</b> | <b>0.989</b>            | <b>D1</b> | <b>0.976</b>            |
| <b>Blackpool</b>                    | <b>2015</b> | <b>D1</b> | <b>0.993</b>            | <b>D1</b> | <b>0.985</b>            |
| Blackpool                           | 2018        | D1        | 0.952                   | D1        | 0.896                   |
| Kingston upon Hull, City of         | 2016        | D1        | 0.955                   | D1        | 0.892                   |
| <b>Kingston upon Hull, City of</b>  | <b>2017</b> | <b>D1</b> | <b>1.000</b>            | <b>D1</b> | <b>0.998</b>            |
| Leicester                           | 2015        | D1        | 0.953                   | D1        | 0.902                   |
| Leicester                           | 2017        | D1        | 0.960                   | D1        | 0.891                   |
| Manchester                          | 2014        | D1        | 0.970                   | D1        | 0.933                   |
| Stoke-on-Trent                      | 2018        | D1        | 0.974                   | D1        | 0.918                   |
| South Tyneside                      | 2018        | D2        | 0.967                   | D1        | 0.945                   |
| <b>Birmingham</b>                   | <b>2014</b> | <b>D1</b> | <b>1.000</b>            | <b>D1</b> | <b>0.996</b>            |
| Walsall                             | 2015        | D2        | 0.970                   | D1        | 0.933                   |
| Walsall                             | 2017        | D2        | 0.974                   | D1        | 0.920                   |
| <b>Wolverhampton</b>                | <b>2018</b> | <b>D1</b> | <b>0.995</b>            | <b>D1</b> | <b>0.978</b>            |
| Bradford                            | 2016        | D1        | 0.965                   | D1        | 0.870                   |
| <b>Leeds</b>                        | <b>2015</b> | <b>D3</b> | <b>0.980</b>            | <b>D2</b> | <b>0.985</b>            |
| <b>Newcastle upon Tyne</b>          | <b>2014</b> | <b>D2</b> | <b>0.967</b>            | <b>D2</b> | <b>0.970</b>            |
| <b>Southampton</b>                  | <b>2013</b> | <b>D3</b> | <b>0.974</b>            | <b>D2</b> | <b>0.977</b>            |
| <b>Tendring</b>                     | <b>2017</b> | <b>D3</b> | <b>0.961</b>            | <b>D2</b> | <b>0.967</b>            |
| <b>Bristol, City of</b>             | <b>2013</b> | <b>D3</b> | <b>0.975</b>            | <b>D3</b> | <b>0.985</b>            |
| <b>Bristol, City of</b>             | <b>2018</b> | <b>D3</b> | <b>0.977</b>            | <b>D3</b> | <b>0.990</b>            |
| <b>Cornwall inc Isles of Scilly</b> | <b>2018</b> | <b>D3</b> | <b>0.995</b>            | <b>D4</b> | <b>0.993</b>            |
| <b>Ashford</b>                      | <b>2018</b> | <b>D6</b> | <b>0.957</b>            | <b>D5</b> | <b>0.958</b>            |
| <b>Breckland</b>                    | <b>2018</b> | <b>D6</b> | <b>0.995</b>            | <b>D5</b> | <b>0.995</b>            |
| <b>Hillingdon</b>                   | <b>2018</b> | <b>D4</b> | <b>0.951</b>            | <b>D5</b> | <b>0.959</b>            |
| Cherwell                            | 2014        | D8        | 0.952                   | D7        | 0.942                   |
| <b>Dorset Council</b>               | <b>2016</b> | <b>D7</b> | <b>0.963</b>            | <b>D7</b> | <b>0.965</b>            |
| <b>Teignbridge</b>                  | <b>2012</b> | <b>D6</b> | <b>0.965</b>            | <b>D7</b> | <b>0.964</b>            |
| <b>Stroud</b>                       | <b>2016</b> | <b>D8</b> | <b>0.975</b>            | <b>D9</b> | <b>0.976</b>            |
| <b>Bath and North East</b>          |             |           |                         |           |                         |
| <b>Somerset</b>                     | <b>2016</b> | <b>D9</b> | <b>0.966</b>            | <b>D9</b> | <b>0.967</b>            |

## Mortality rates for the detected areas under the main model and comparison against the corresponding decile (IMD2019), females

Figure S1: Kingston upon Hull, females

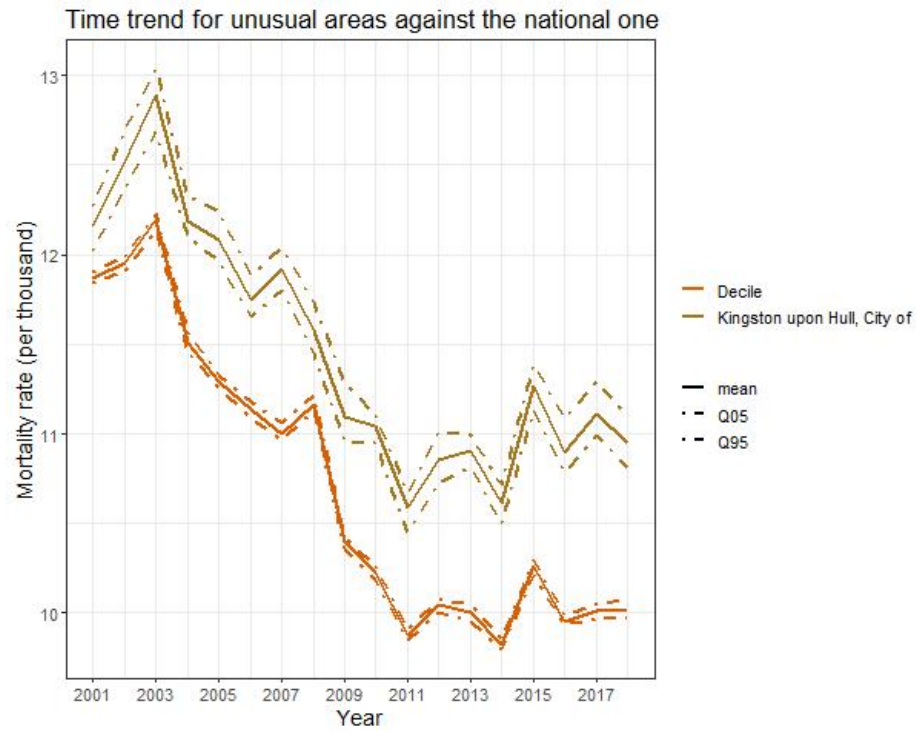

Figure S2: Stoke-on-Trent, females

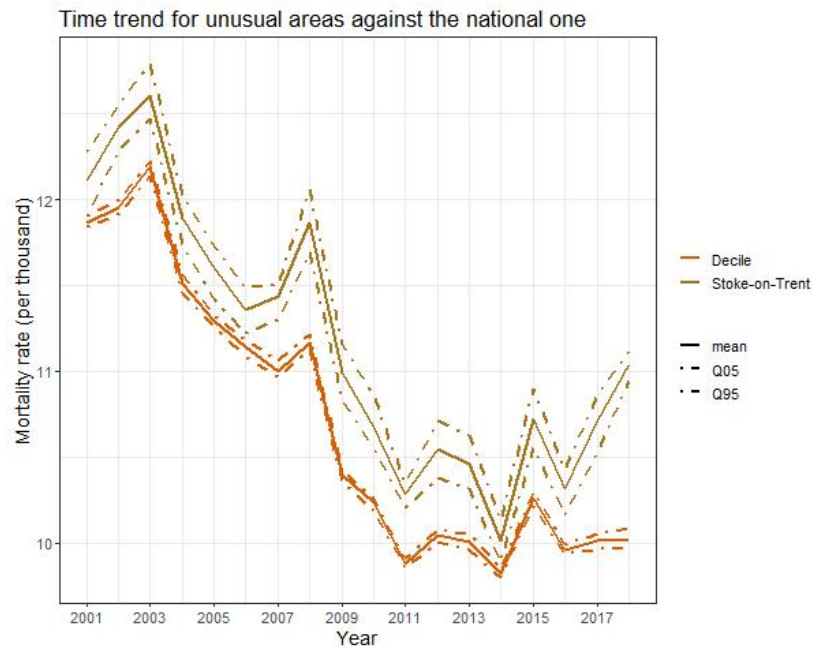

Figure S3: Tameside, females

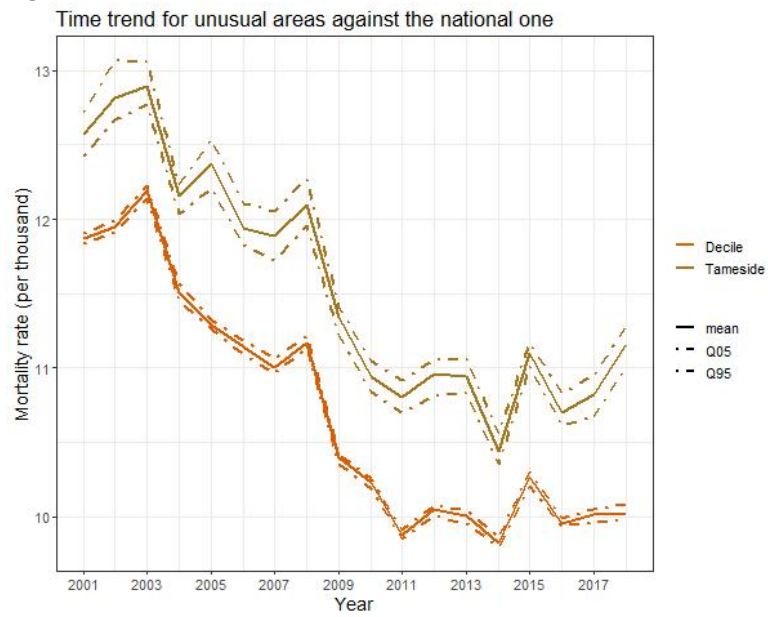

Figure S4: Newcastle upon Tyne, females

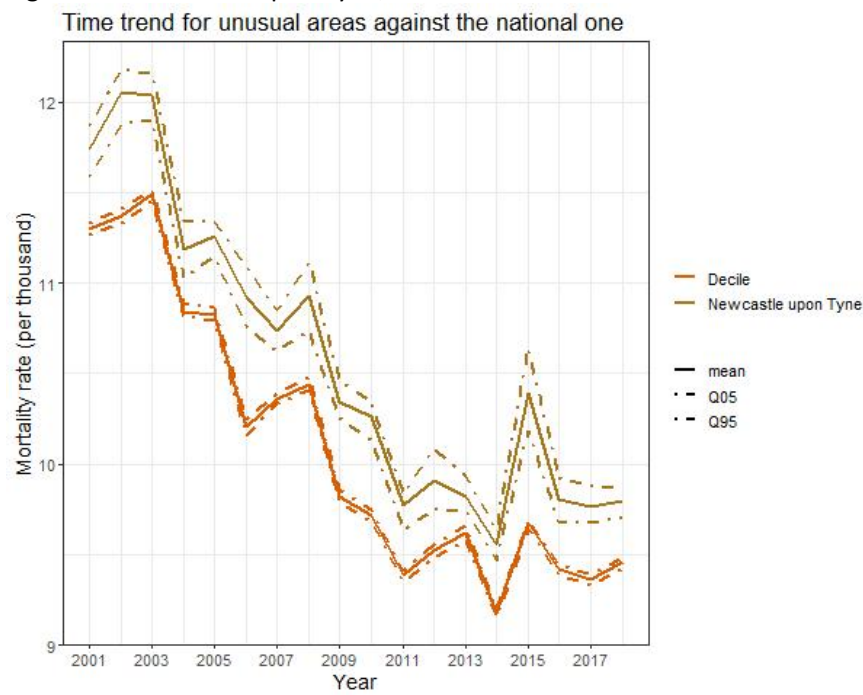

Figure S5: Plymouth, females

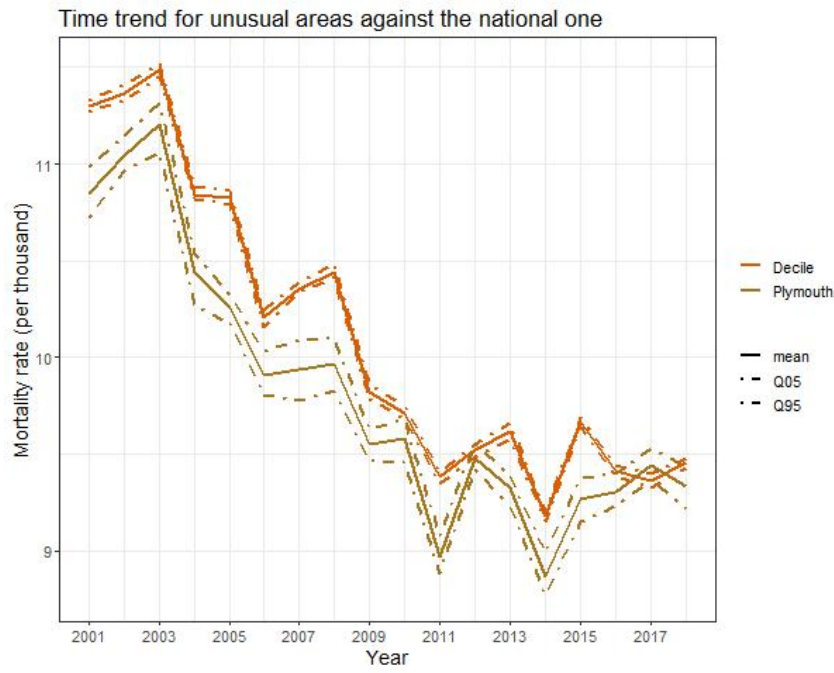

Figure S6: Leeds, females

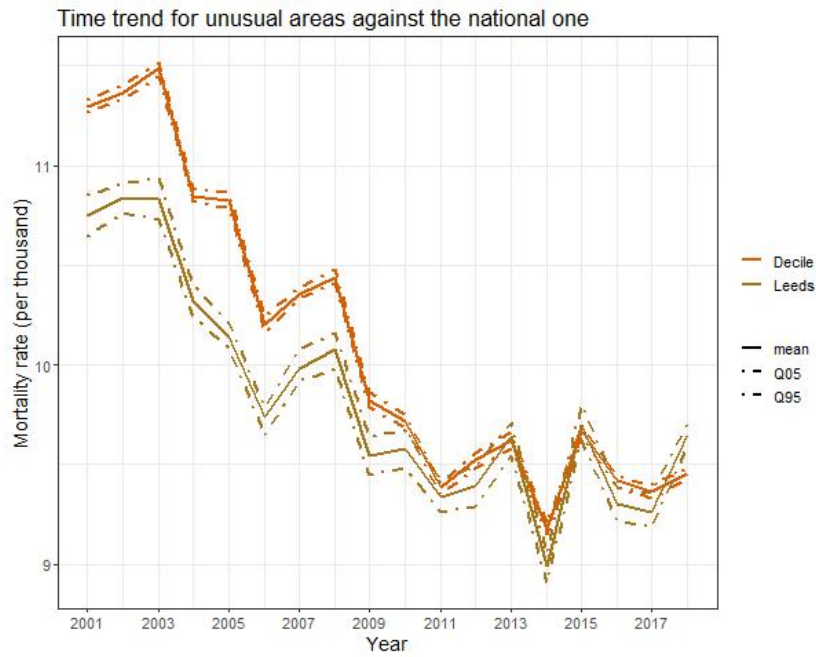

Figure S7: Derby, females

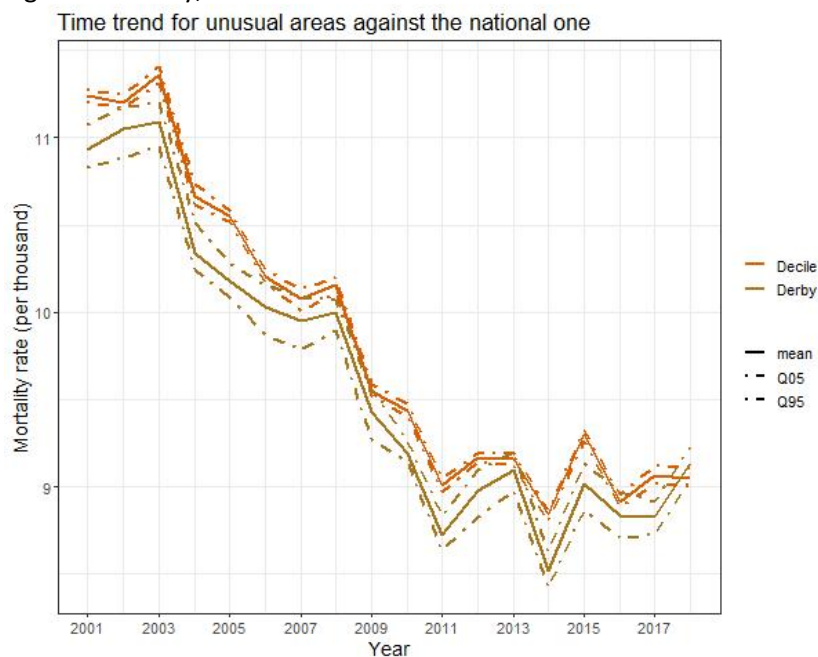

Figure S8: County Durham, females

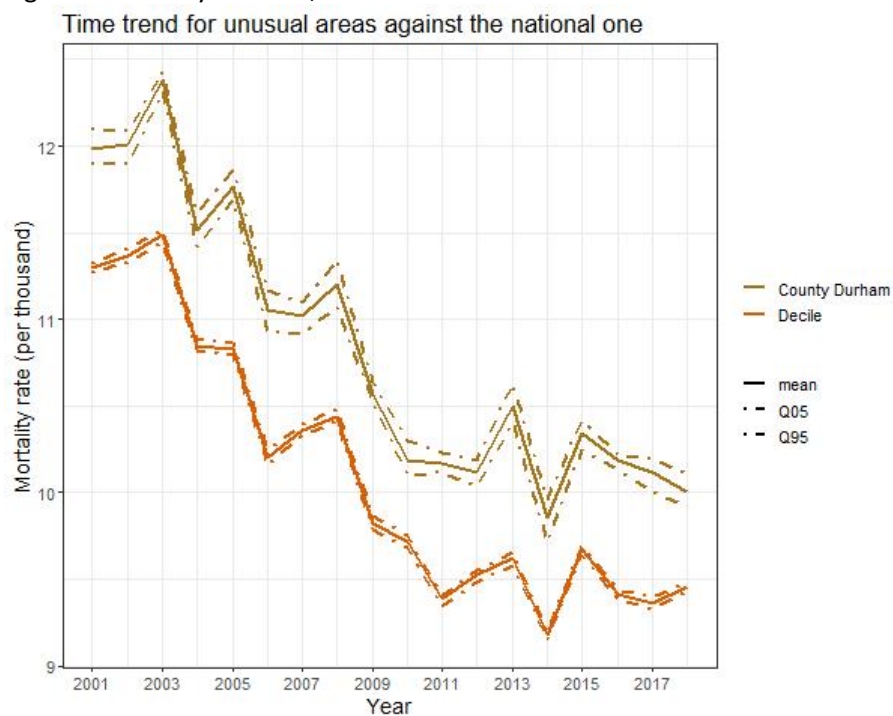



Figure S9: Cornwall including the Isles of Scilly, females  
Time trend for unusual areas against the national one

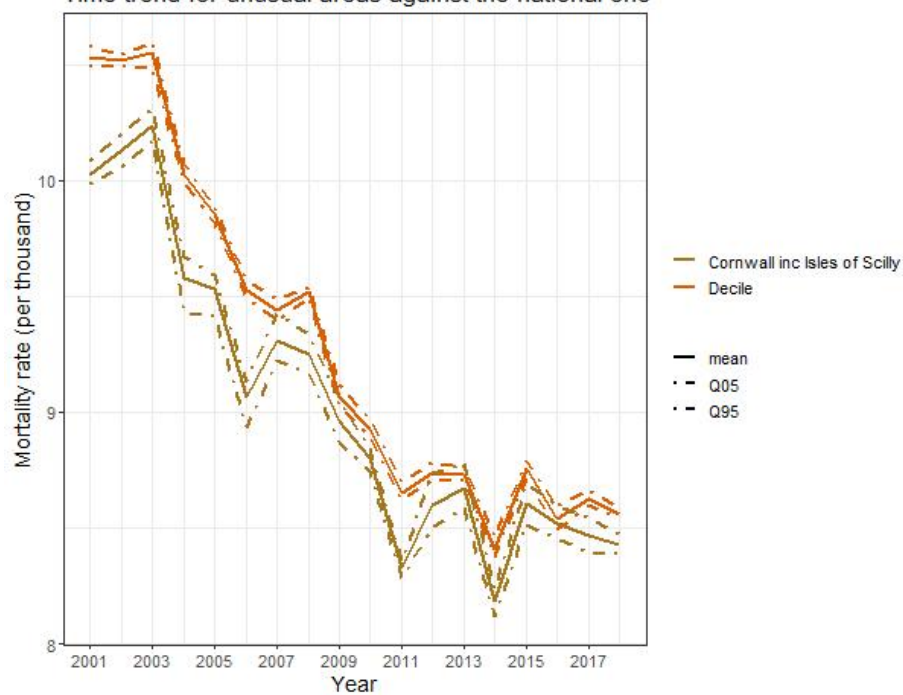

Figure S10: Bournemouth, Christchurch and Poole, Females  
Time trend for unusual areas against the national one

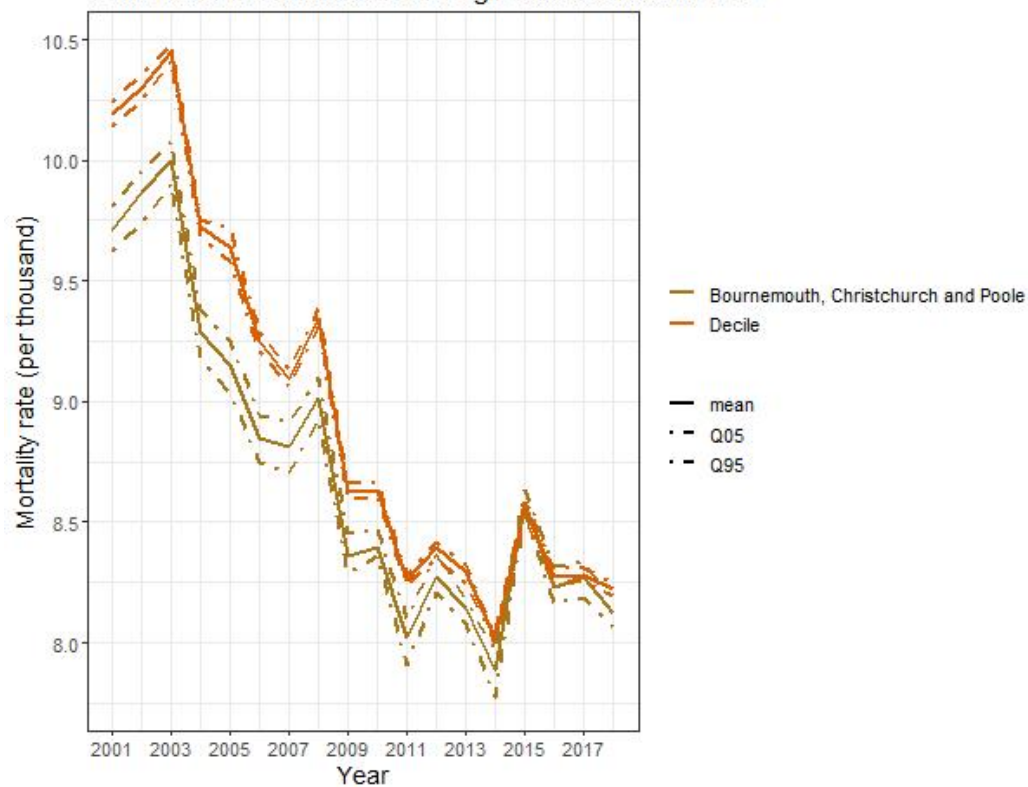

Figure S11: Stroud, females

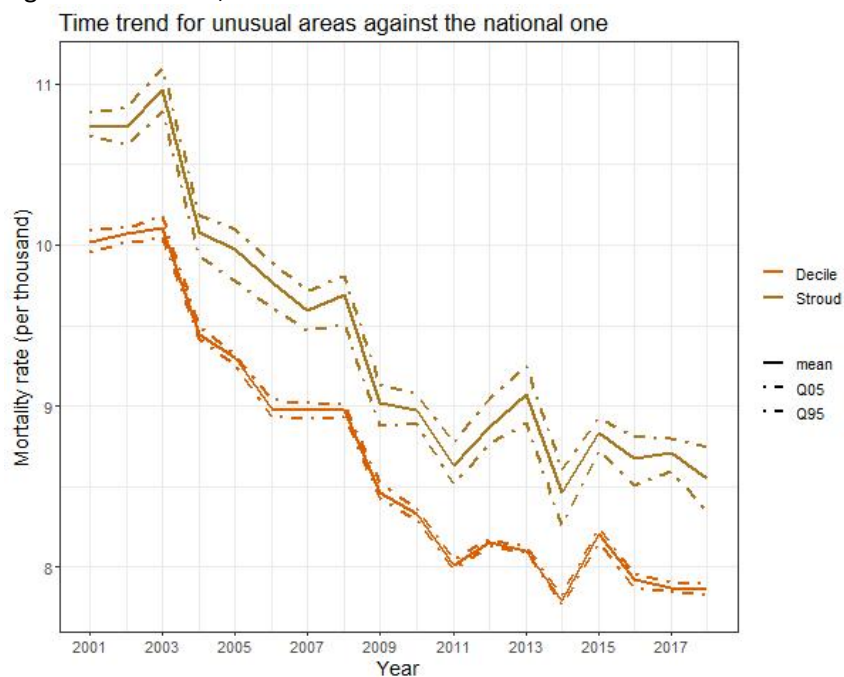

Figure S12: Sutton, females

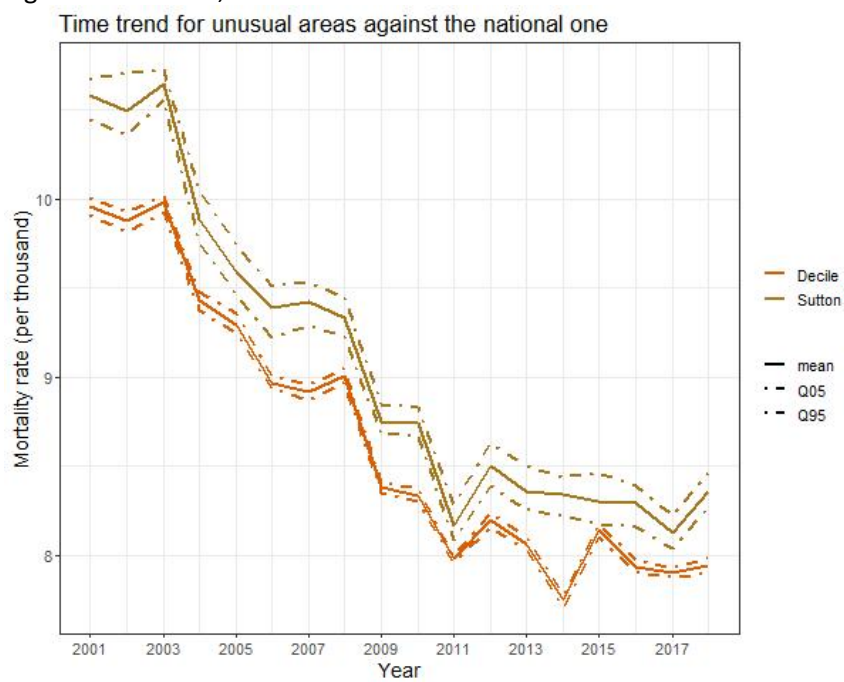

## Mortality rates for the detected areas under the main model and comparison against the corresponding decile (IMD2019), males

Figure S13: Middlesbrough, males

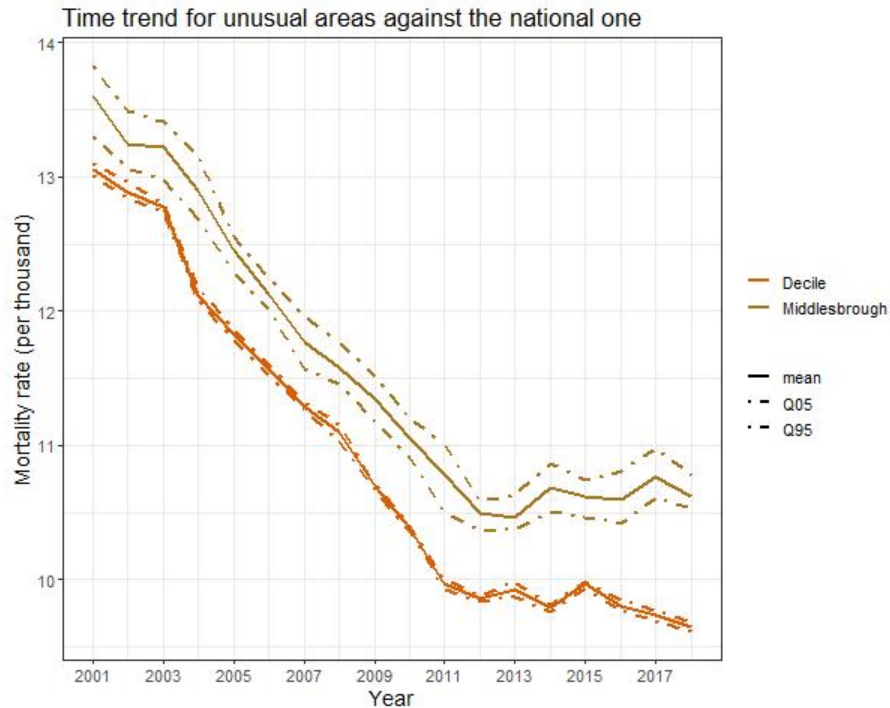

Figure S14: Wolverhampton, males

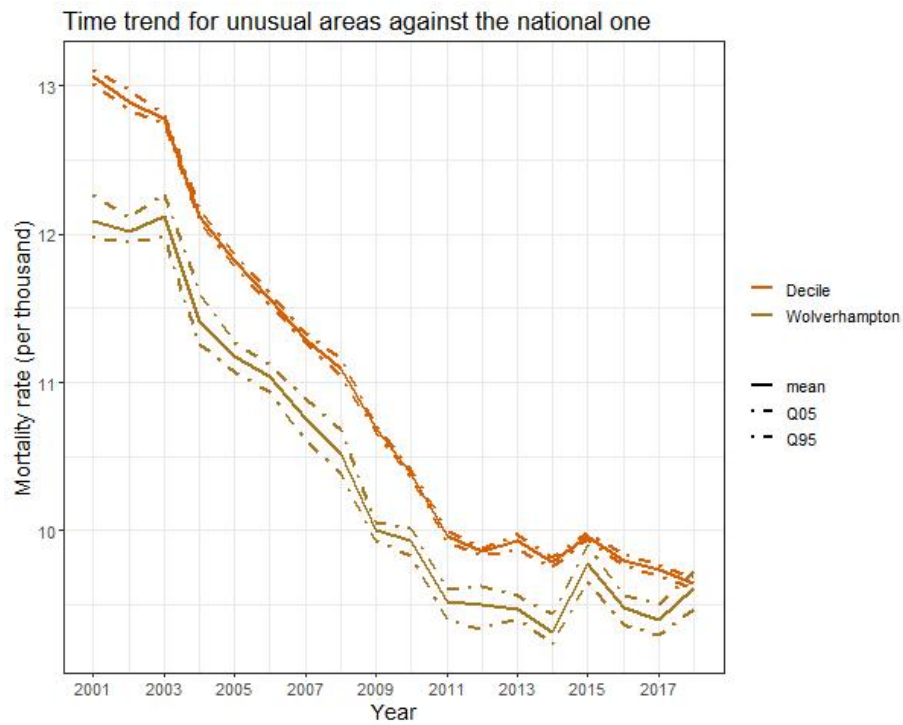

Figure S15: Kingston upon Hull, males

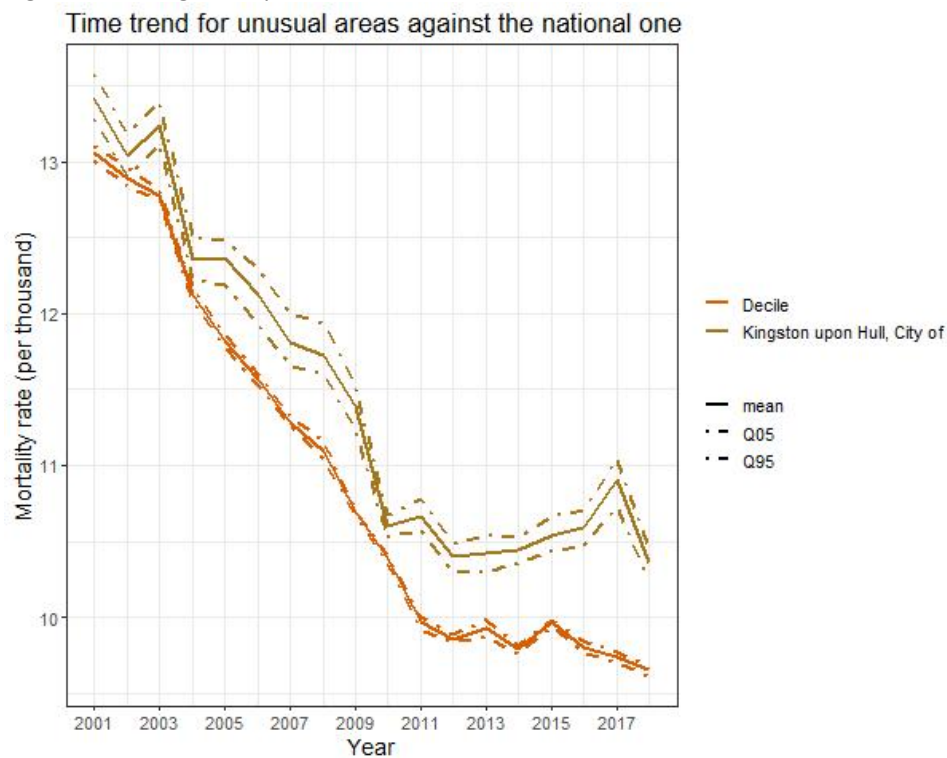

Figure S16: Birmingham, males

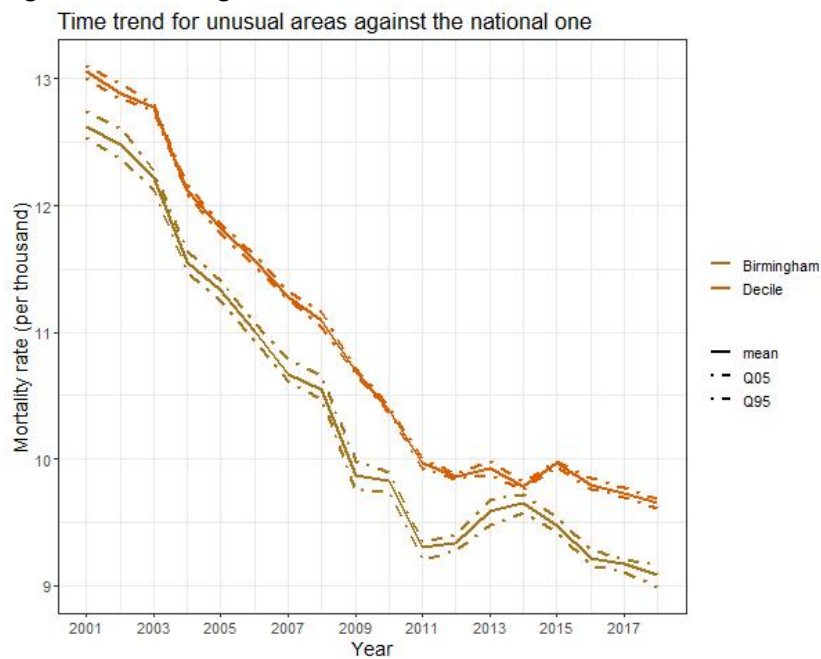

Figure S17: Tendring, males

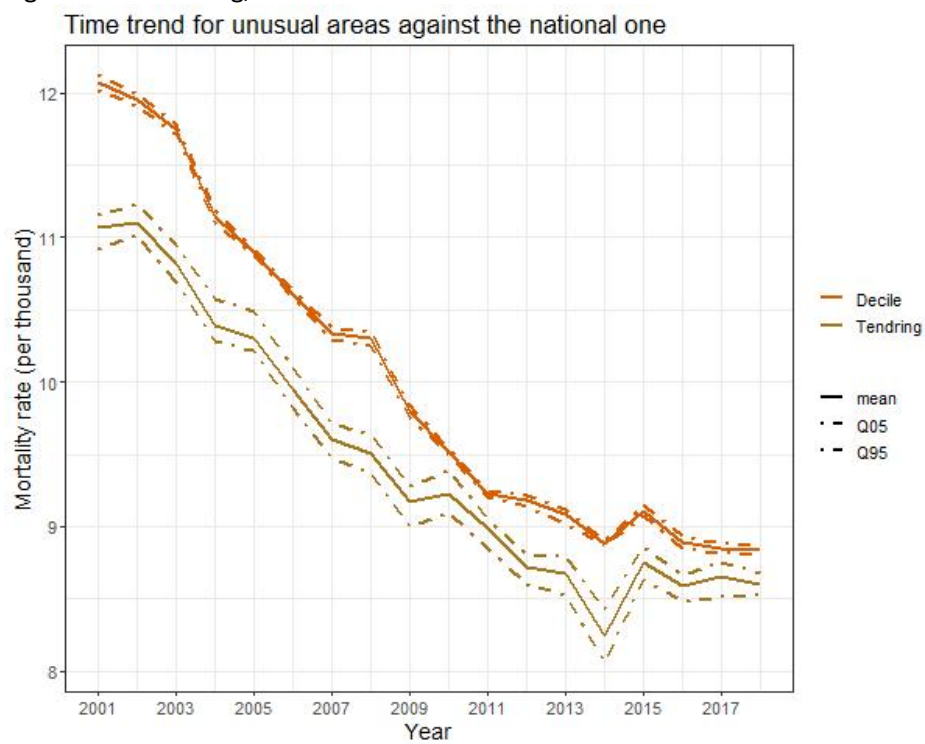

Figure S18: Leeds, males

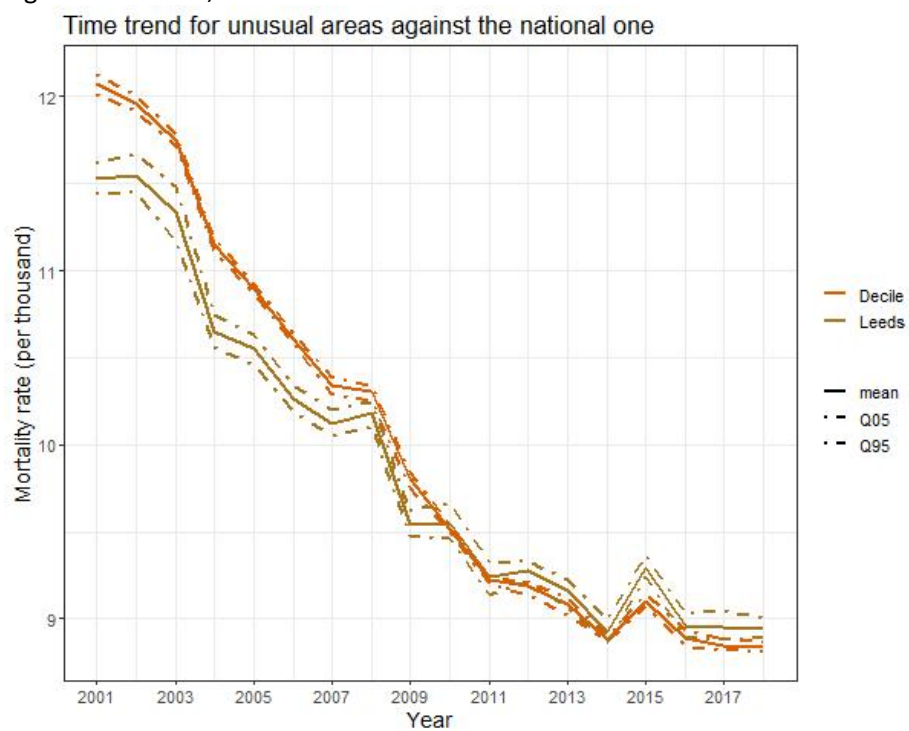

Figure S19: Newcastle upon Tyne, males

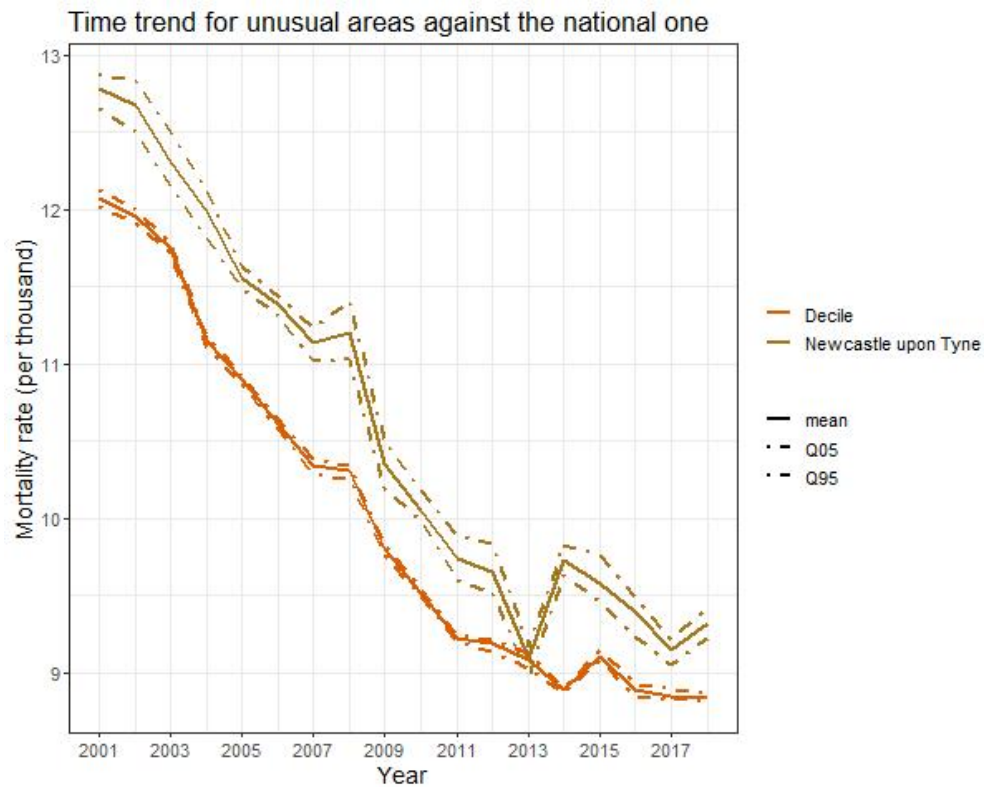

Figure S20: Southampton, males

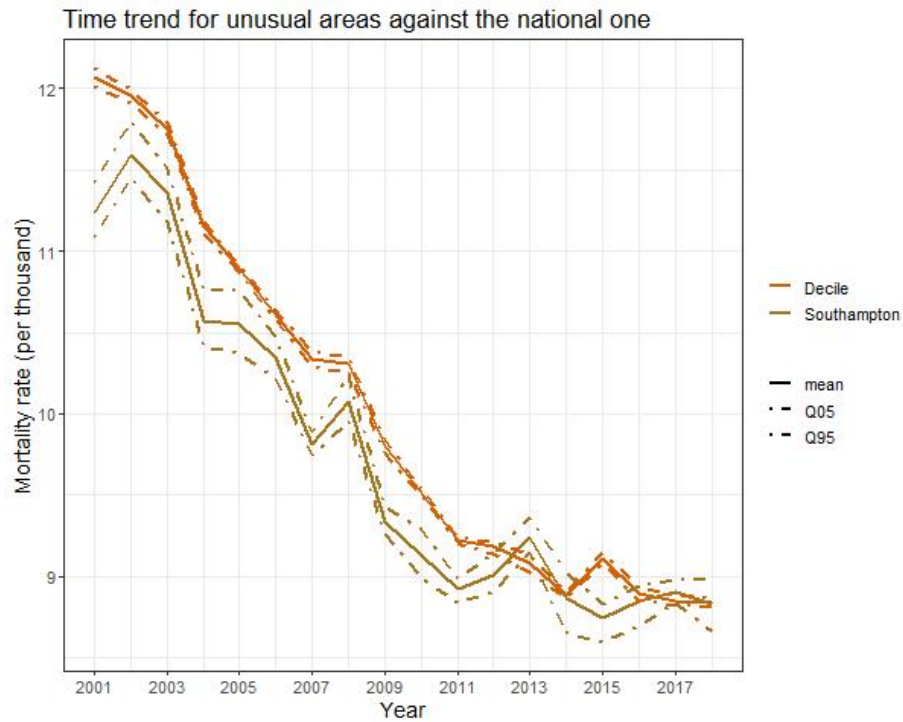

Figure S21: Bristol, males

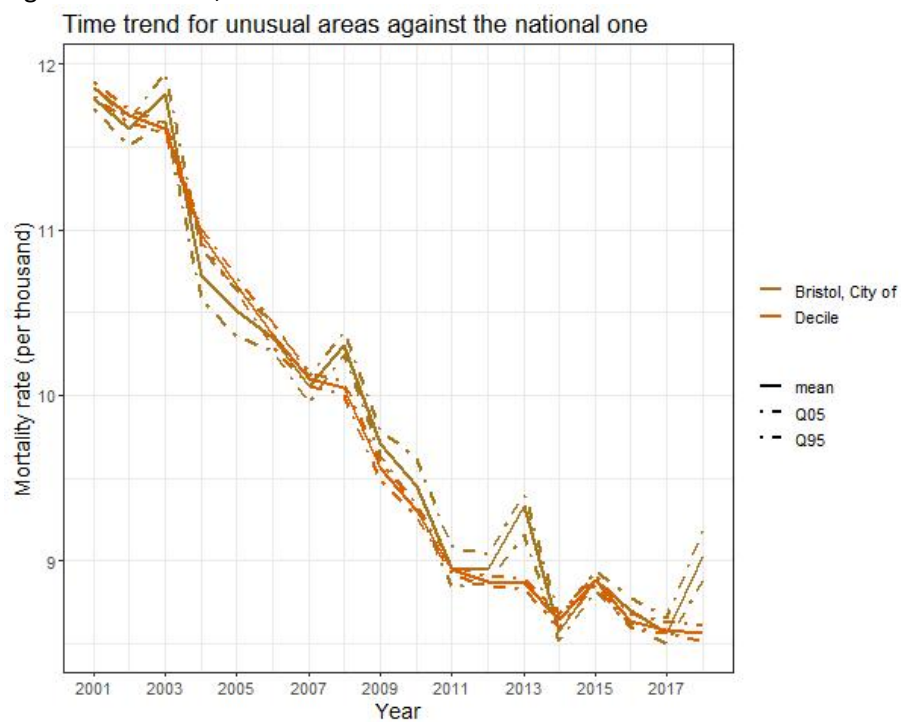

Figure S22: Cornwall including Isles of Scilly, males

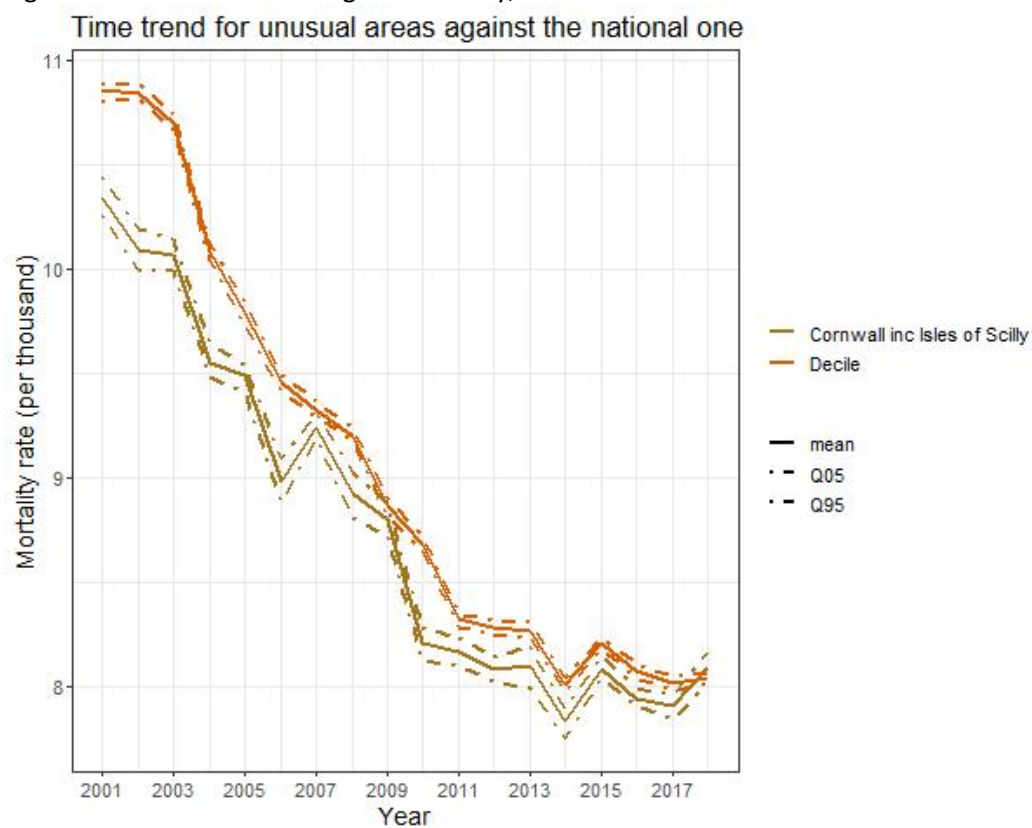

Figure S23: Breckland, males

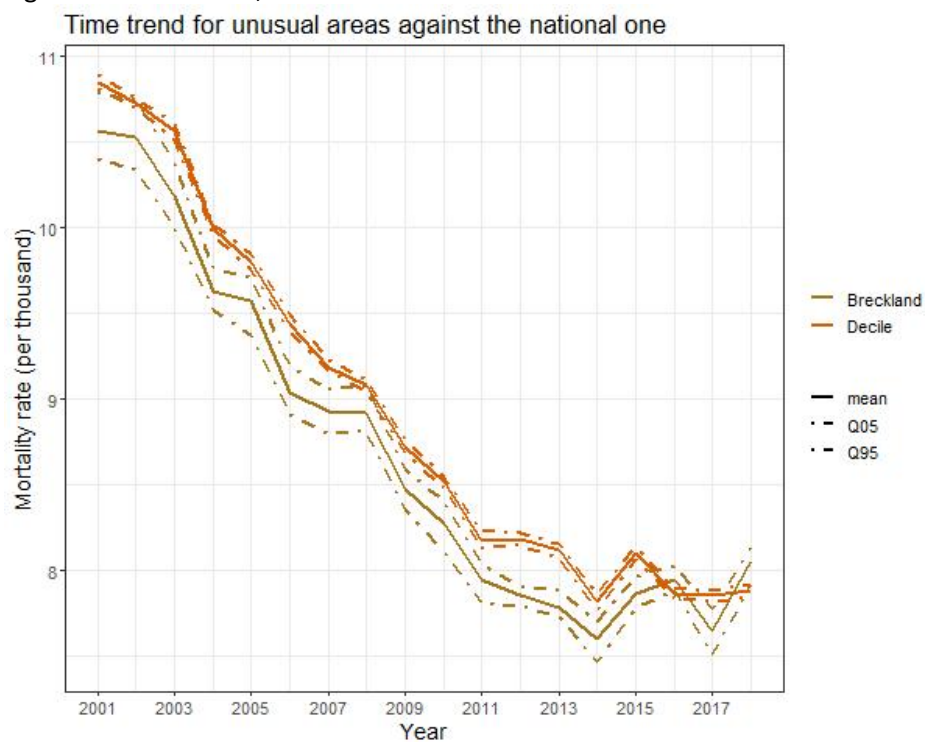

Figure S24: Ashford, males

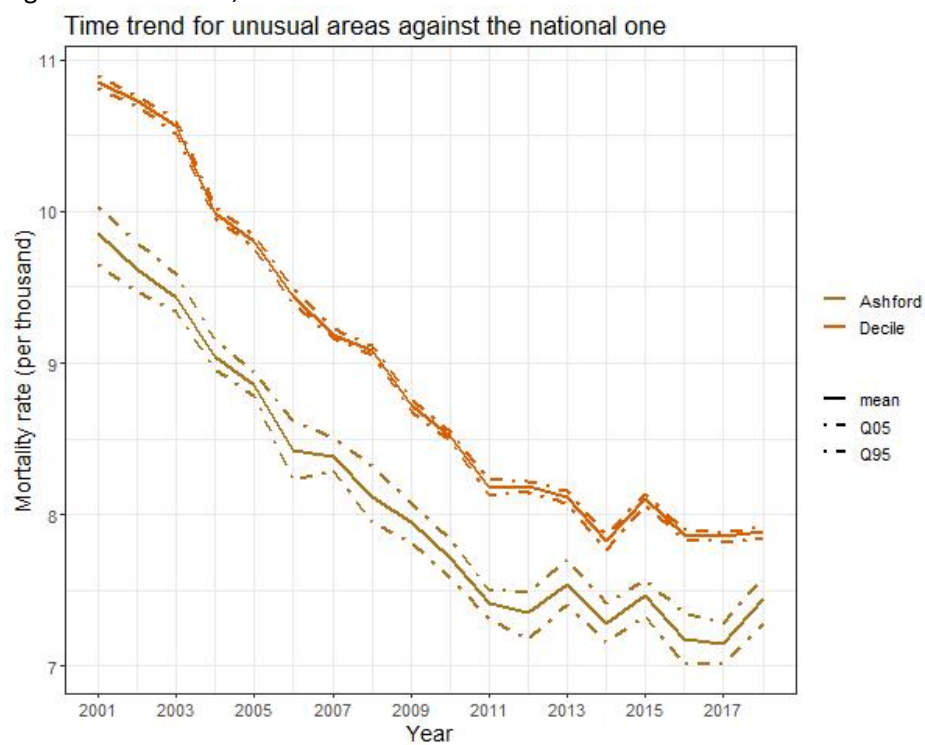



Figure S25: Hillingdon, males

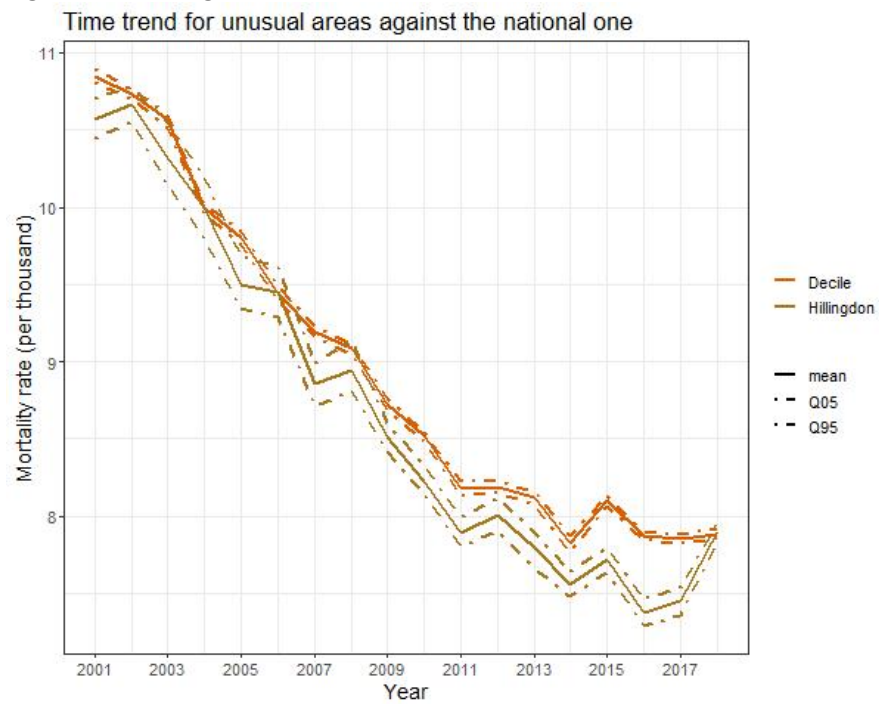

Figure S26: Cheshire West and Chester, males

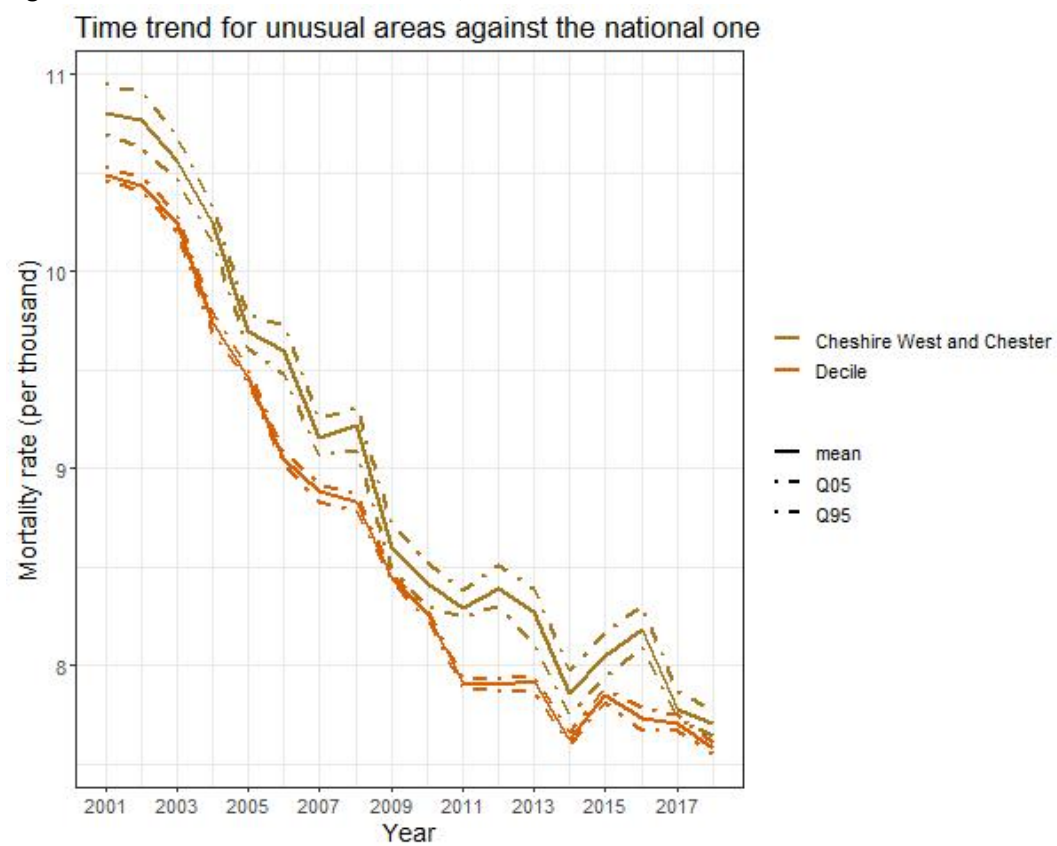

Figure S27: Dorset council, males

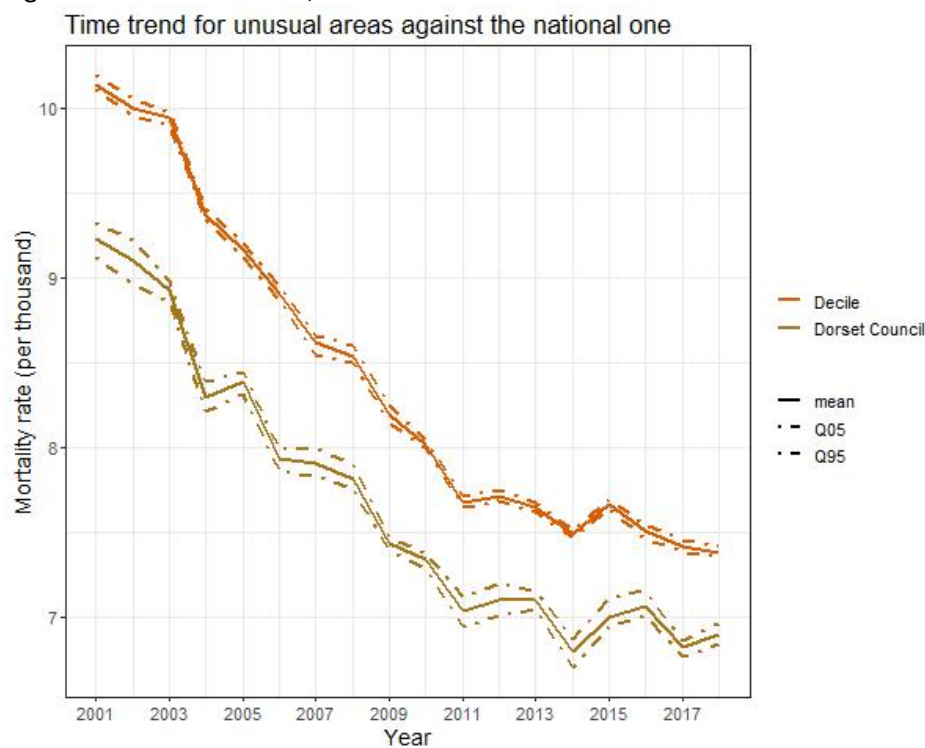

Figure S28: Teignbridge, males

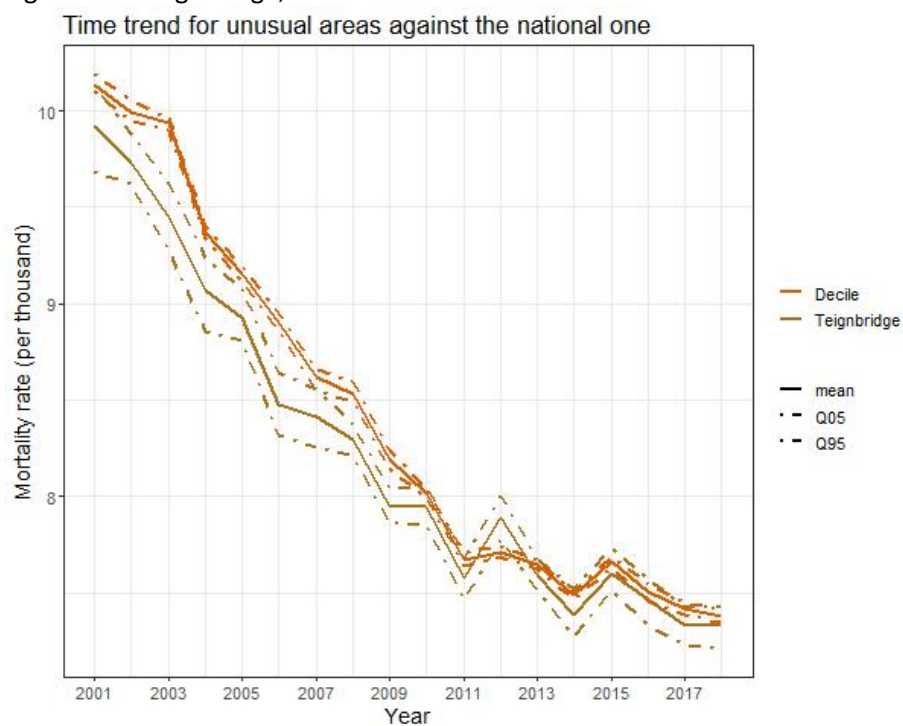

Figure S29: Stroud, males

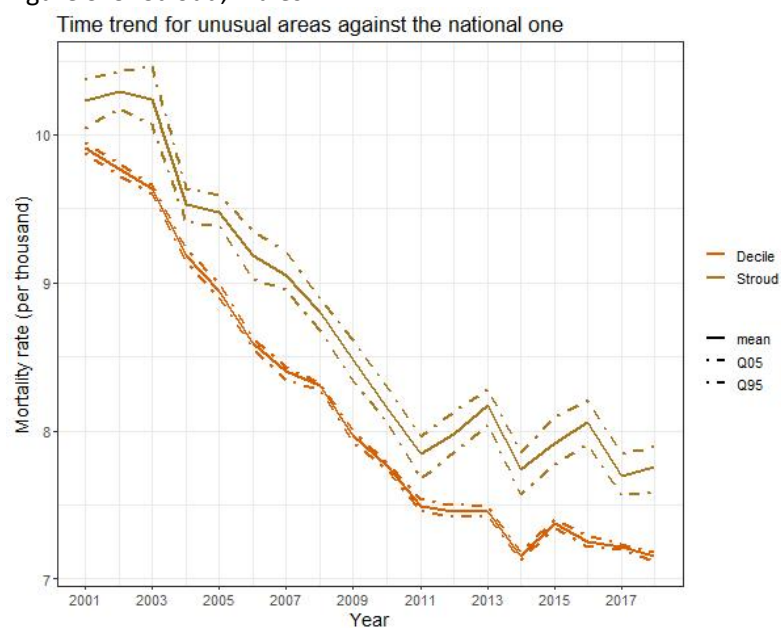

Figure S30: Bath and North East Somerset, males

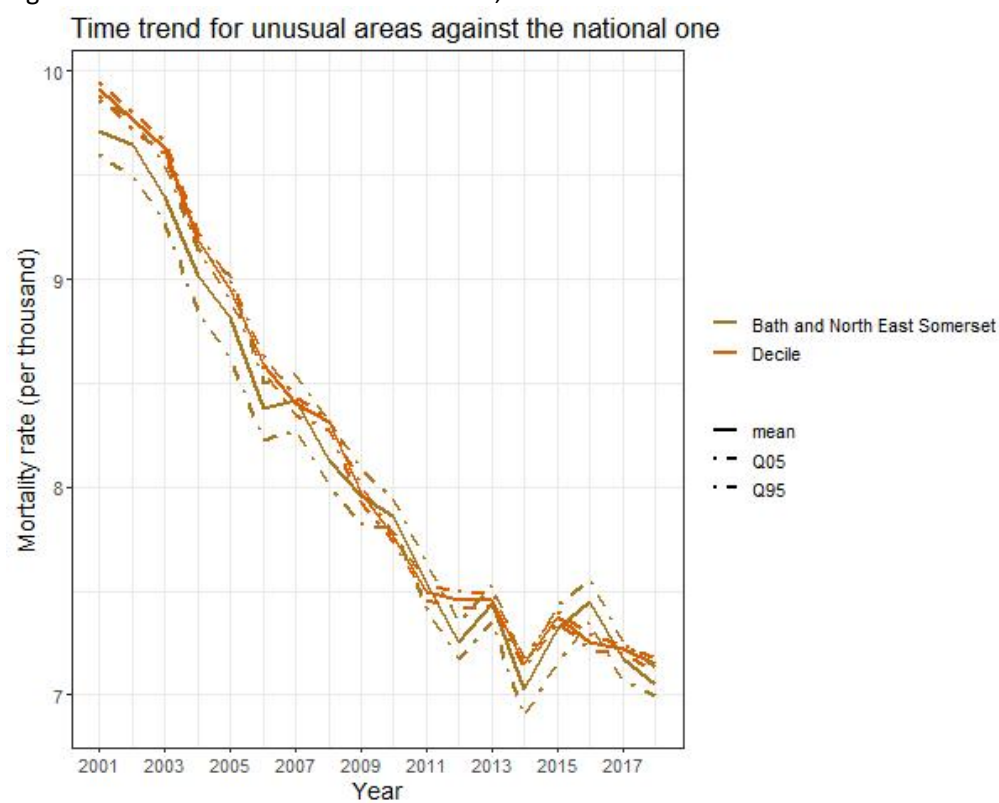

Supplement: inline-supplementary-material-1 [file inline-supplementary-material-1.pdf]
